# Supplementary material for: Rotational spectra of van der Waals complexes: pyrrole–Ne and pyrrole–Ne2
Source: Royal Society of Chemistry journal article supplement (doi:10.1039/d0cp04580b), 2020-01-01
Supplement: d0cp04580b1.pdf [file d0cp04580b1.pdf]

## Rotational spectra of van der Waals complexes: pyrrole–Ne and pyrrole–Ne<sub>2</sub>

Isabel Peña,\* Carlos Cabezas\*

\* Corresponding Authors, Email: [ipencal@qf.uva.es](mailto:ipencal@qf.uva.es); [carlos.cabezas@csic.es](mailto:carlos.cabezas@csic.es)

### Supplementary Information

#### Table of Contents

**Table S1.** Rotational constants (in MHz) for the Pyr–Ne complex at different levels of theory.

**Table S2.** Rotational constants (in MHz) for the Pyr–Ne<sub>2</sub> complex at different levels of theory.

**Table S3.** Rotational constants (in MHz) for the Py–Ne complex at different levels of theory.

**Table S4.** Rotational constants (in MHz) for the Pyr–Ar complex at different levels of theory.

**Table S5.** Optimized geometry (xyz format, in Angstrom) at the CCSD/def2–TZVPP level of theory for Pyr–Ne complex.

**Table S6.** Optimized geometry (xyz format, in Angstrom) at the CCSD/def2–TZVPP level of theory the [1,1] isomer of Pyr–Ne<sub>2</sub> complex.

**Table S7.** Optimized geometry (xyz format, in Angstrom) at the CCSD/def2–TZVPP level of theory of the [2,0] isomer of Pyr–Ne<sub>2</sub> complex.

**Tables S8–S12.** Measured frequencies of the rotational transitions of the observed Pyr–Ne and Pyr–Ne<sub>2</sub> complexes.

**Table S1.** Rotational constants (in MHz) for the Pyr–Ne complex at different levels of theory. Experimental rotational constants are provided for comparison.

|                                  | <i>A</i>  | <i>B</i>  | <i>C</i>  |
|----------------------------------|-----------|-----------|-----------|
| <b>EXPERIMENTAL</b>              | 4654.5380 | 2101.6705 | 2099.3956 |
| <b>B3LYP/6–311++G(d,p)</b>       | 5114.1    | 1751.7    | 1683.3    |
| <b>B3LYP/6–311++G(2d,p)</b>      | 5423.2    | 1634.8    | 1549.3    |
| <b>B3LYP/cc–pVTZ</b>             | 4694.4    | 2198.6    | 2176.5    |
| <b>B3LYP/aug–cc–pVTZ</b>         | 4659.7    | 1701.3    | 1692.0    |
| <b>B3LYP/def2–TZVPP</b>          | 4680.2    | 1848.3    | 1835.0    |
| <b>B3LYP–D3BJ/6–311++G(d,p)</b>  | 4681.9    | 2287.0    | 2259.8    |
| <b>B3LYP–D3BJ/6–311++G(2d,p)</b> | 4637.9    | 2342.9    | 2329.4    |
| <b>B3LYP–D3BJ /cc–pVTZ</b>       | 4626.6    | 2407.5    | 2398.9    |
| <b>B3LYP–D3BJ /aug–cc–pVTZ</b>   | 4614.7    | 2273.7    | 2268.0    |
| <b>B3LYP–D3BJ /def2–TZVPP</b>    | 4691.4    | 2269.3    | 2246.1    |
| <b>M06–2X/6–311++G(d,p)</b>      | 4600.7    | 2596.2    | 2594.7    |
| <b>M06–2X/6–311++G(2d,p)</b>     | 4609.5    | 2600.8    | 2600.3    |
| <b>M06–2X/cc–pVTZ</b>            | 4613.0    | 2600.3    | 2598.7    |
| <b>M06–2X/aug–cc–pVTZ</b>        | 4607.0    | 2541.8    | 2593.1    |
| <b>M06–2X/ def2–TZVPP</b>        | 4604.5    | 2495.3    | 2491.3    |
| <b>MP2/6–311++G(d,p)</b>         | 4613.3    | 2193.4    | 2181.9    |
| <b>MP2/6–311++G(2d,p)</b>        | 4671.8    | 2198.5    | 2177.7    |
| <b>MP2/ cc–pVTZ</b>              | 4626.7    | 2269.1    | 2263.3    |
| <b>MP2/aug–cc–pVTZ</b>           | 4585.7    | 2355.8    | 2353.3    |
| <b>MP2/def2–TZVPP</b>            | 4579.5    | 2347.8    | 2343.2    |
| <b>B97D/6–311++G(d,p)</b>        | 4624.6    | 2140.5    | 2120.4    |
| <b>B97D/6–311++G(2d,p)</b>       | 4660.3    | 2161.4    | 2136.7    |
| <b>B97D/ cc–pVTZ</b>             | 4584.7    | 2315.0    | 2308.1    |
| <b>B97D/aug–cc–pVTZ</b>          | 4567.4    | 2078.6    | 2075.9    |
| <b>B97D/def2–TZVPP</b>           | 4647.9    | 2142.8    | 2123.3    |
| <b>wB97XD/6–311++G(d,p)</b>      | 4634.0    | 2039.8    | 2033.6    |
| <b>wB97XD/6–311++G(2d,p)</b>     | 4640.2    | 2055.4    | 2050.9    |
| <b>wB97XD/ cc–pVTZ</b>           | 4645.9    | 2198.7    | 2194.4    |
| <b>wB97XD/aug–cc–pVTZ</b>        | 4640.2    | 2077.8    | 2074.6    |
| <b>wB97XD/def2–TZVPP</b>         | 4639.5    | 2049.0    | 2046.4    |
| <b>CCSD/6–311++G(d,p)</b>        | 4650.4    | 2154.7    | 2132.7    |
| <b>CCSD/6–311++G(2d,p)</b>       | 4681.8    | 2191.6    | 2167.4    |
| <b>CCSD/cc–pVTZ</b>              | 4653.2    | 2215.1    | 2202.0    |
| <b>CCSD/aug–cc–pVTZ</b>          | 4606.2    | 2303.0    | 2298.9    |
| <b>CCSD/def2–TZVPP</b>           | 4638.1    | 2117.3    | 2108.7    |

**Table S2.** Rotational constants (in MHz) for the Pyr–Ne<sub>2</sub> complex at different levels of theory. Experimental rotational constants are provided for comparison.

|                                  | <i>A</i>  | <i>B</i> | <i>C</i> |
|----------------------------------|-----------|----------|----------|
| <b>EXPERIMENTAL</b>              | 4408.6361 | 965.0390 | 954.7953 |
| <b>B3LYP/6–311++G(d,p)</b>       | 3039.1    | 917.9    | 833.5    |
| <b>B3LYP/6–311++G(2d,p)</b>      | 4256.9    | 876.6    | 863.8    |
| <b>B3LYP/cc–pVTZ</b>             | 4191.4    | 1015.1   | 993.9    |
| <b>B3LYP/aug–cc–pVTZ</b>         | 4447.5    | 1115.2   | 1113.3   |
| <b>B3LYP/def2–TZVPP</b>          | 3604.9    | 860.5    | 818.3    |
| <b>B3LYP–D3BJ/6–311++G(d,p)</b>  | 4286.8    | 1081.9   | 1065.3   |
| <b>B3LYP–D3BJ/6–311++G(2d,p)</b> | 4311.3    | 1090.4   | 1074.1   |
| <b>B3LYP–D3BJ /cc–pVTZ</b>       | 4328.1    | 1129.3   | 1112.4   |
| <b>B3LYP–D3BJ /aug–cc–pVTZ</b>   | 4317.8    | 1036.1   | 1021.5   |
| <b>B3LYP–D3BJ /def2–TZVPP</b>    | 4322.4    | 1064.1   | 1048.8   |
| <b>M06–2X/6–311++G(d,p)</b>      | 4274.3    | 1033.5   | 1017.9   |
| <b>M06–2X/6–311++G(2d,p)</b>     | 4283.2    | 1065.9   | 1048.9   |
| <b>M06–2X/cc–pVTZ</b>            | 4354.4    | 1054.9   | 1041.3   |
| <b>M06–2X/aug–cc–pVTZ</b>        | 4525.6    | 1185.7   | 1179.6   |
| <b>M06–2X/ def2–TZVPP</b>        | 4542.0    | 1158.7   | 1153.8   |
| <b>MP2/6–311++G(d,p)</b>         | 4476.9    | 1227.3   | 1218.6   |
| <b>MP2/6–311++G(2d,p)</b>        | 4283.2    | 1065.9   | 1048.9   |
| <b>MP2/ cc–pVTZ</b>              | 4345.4    | 1054.9   | 1041.3   |
| <b>MP2/aug–cc–pVTZ</b>           | 4443.9    | 1091.2   | 1082.4   |
| <b>MP2/def2–TZVPP</b>            | 4365.0    | 933.7    | 922.6    |
| <b>B97D/6–311++G(d,p)</b>        | 4035.1    | 1014.7   | 987.4    |
| <b>B97D/6–311++G(2d,p)</b>       | 4144.2    | 1016.2   | 994.6    |
| <b>B97D/ cc–pVTZ</b>             | 4281.8    | 1072.3   | 1056.2   |
| <b>B97D/aug–cc–pVTZ</b>          | 4270.8    | 961.1    | 947.7    |
| <b>B97D/def2–TZVPP</b>           | 4239.7    | 995.4    | 979.3    |
| <b>wB97XD/6–311++G(d,p)</b>      | 4343.4    | 933.1    | 922.0    |
| <b>wB97XD/6–311++G(2d,p)</b>     | 4358.2    | 933.8    | 922.6    |
| <b>wB97XD/ cc–pVTZ</b>           | 4350.5    | 1035.2   | 1020.7   |
| <b>wB97XD/aug–cc–pVTZ</b>        | 4364.7    | 938.6    | 927.7    |
| <b>wB97XD/def2–TZVPP</b>         | 4365.9    | 933.7    | 922.7    |
| <b>CCSD/6–311++G(d,p)</b>        | 4296.3    | 1019.6   | 1006.3   |
| <b>CCSD/6–311++G(2d,p)</b>       | 4337.2    | 1053.6   | 1040.7   |
| <b>CCSD/cc–pVTZ</b>              | 4292.7    | 1030.1   | 1013.8   |
| <b>CCSD/aug–cc–pVTZ</b>          | 4409.3    | 1065.8   | 1055.3   |
| <b>CCSD/def2–TZVPP</b>           | 4322.7    | 973.9    | 961.0    |

**Table S3.** Rotational constants (in MHz) for the Py–Ne complex at different levels of theory. The experimental values for this species (ref. 12) are also shown for comparison.

|                              | <i>A</i> | <i>B</i>  | <i>C</i>  |
|------------------------------|----------|-----------|-----------|
| <b>EXPERIMENTAL</b>          | 3011.463 | 1876.4048 | 1858.0647 |
| <b>B3LYP/6–311++G(d,p)</b>   | 3555.4   | 1397.1    | 1306.5    |
| <b>B3LYP/cc–pVTZ</b>         | 2994.9   | 1931.2    | 1905.0    |
| <b>B3LYP–D3BJ/def2–TZVPP</b> | 2989.4   | 2028.3    | 2005.7    |
| <b>B97D/aug–cc–pVTZ</b>      | 2979.7   | 1860.9    | 1849.5    |
| <b>B97D/def2–TZVPP</b>       | 2955.9   | 1960.1    | 1936.9    |
| <b>wB97XD/aug–cc–pVTZ</b>    | 3032.0   | 1890.3    | 1880.9    |
| <b>wB97XD/def2–TZVPP</b>     | 3006.0   | 1838.7    | 1820.4    |
| <b>MP2/6–311++G(d,p)</b>     | 2975.4   | 1921.8    | 1907.8    |
| <b>MP2/6–311++G(2d,p)</b>    | 2994.4   | 1958.2    | 1946.8    |
| <b>MP2/cc–pVTZ</b>           | 2979.0   | 2027.8    | 2002.7    |
| <b>CCSD/6–311++G(d,p)</b>    | 2982.3   | 1882.3    | 1869.9    |
| <b>CCSD/def2–TZVPP</b>       | 2991.9   | 1876.6    | 1859.9    |

**Table S4.** Rotational constants (in MHz) for the Pyr–Ar complex at different levels of theory. The experimental values for this species (ref. 20) are also shown for comparison.

|                              | <i>A</i> | <i>B</i> | <i>C</i> |
|------------------------------|----------|----------|----------|
| <b>EXPERIMENTAL</b>          | 4601.423 | 1355.701 | 1355.070 |
| <b>B3LYP/6–311++G(d,p)</b>   | 4711.7   | 424.4    | 423.3    |
| <b>B3LYP/cc–pVTZ</b>         | 6838.9   | 2029.4   | 2000.5   |
| <b>B3LYP–D3BJ/def2–TZVPP</b> | 4600.8   | 1402.8   | 1402.1   |
| <b>B97D/aug–cc–pVTZ</b>      | 4542.0   | 1297.2   | 1296.1   |
| <b>B97D/def2–TZVPP</b>       | 4565.5   | 1306.0   | 1305.4   |
| <b>wB97XD/aug–cc–pVTZ</b>    | 4632.8   | 1310.2   | 1309.7   |
| <b>wB97XD/def2–TZVPP</b>     | 4637.8   | 1330.6   | 1329.1   |
| <b>MP2/6–311++G(d,p)</b>     | 4565.9   | 1419.8   | 1419.6   |
| <b>MP2/6–311++G(2d,p)</b>    | 4562.8   | 1424.7   | 1422.8   |
| <b>MP2/cc–pVTZ</b>           | 4585.6   | 1437.0   | 1435.3   |
| <b>CCSD/6–311++G(d,p)</b>    | 4580.1   | 1359.2   | 1365.6   |
| <b>CCSD/def2–TZVPP</b>       | 4604.1   | 1333.5   | 1332.9   |

**Table S5.** Optimized geometry (xyz format, in Angstrom) at the CCSD/def2-TZVPP level of theory for the Pyr-Ne complex.

|    |           |           |           |
|----|-----------|-----------|-----------|
| H  | -0.003486 | -2.120706 | -0.345434 |
| N  | -0.001857 | -1.142982 | -0.556452 |
| C  | 1.119586  | -0.373770 | -0.720707 |
| H  | 2.103256  | -0.797922 | -0.630723 |
| C  | 0.714580  | 0.908333  | -0.995403 |
| H  | 1.362826  | 1.747566  | -1.175695 |
| C  | -1.120732 | -0.370131 | -0.721145 |
| H  | -2.105810 | -0.791086 | -0.631546 |
| C  | -0.711456 | 0.910649  | -0.995682 |
| H  | -1.356902 | 1.751984  | -1.176227 |
| Ne | 0.000120  | 0.165867  | 2.649898  |

**Table S6.** Optimized geometry (xyz format, in Angstrom) at the CCSD/def2-TZVPP level of theory for the [1,1] isomer of Pyr-Ne<sub>2</sub> complex.

|    |           |           |           |
|----|-----------|-----------|-----------|
| H  | 0.006371  | -1.932099 | -0.000003 |
| N  | 0.003394  | -0.931864 | -0.000003 |
| C  | 1.121137  | -0.140212 | -0.000003 |
| H  | 2.106825  | -0.569206 | -0.000009 |
| C  | 0.710138  | 1.169075  | 0.000002  |
| H  | 1.354408  | 2.030455  | 0.000003  |
| C  | -1.119040 | -0.146879 | 0.000004  |
| H  | -2.102157 | -0.581732 | 0.000005  |
| C  | -0.715842 | 1.164831  | 0.000007  |
| H  | -1.365227 | 2.022361  | 0.000012  |
| Ne | -0.000110 | -0.312374 | 3.406266  |
| Ne | -0.000113 | -0.312371 | -3.406271 |

**Table S7.** Optimized geometry (xyz format, in Angstrom) at the CCSD/def2-TZVPP level theory for the [2,0] isomer of Pyr-Ne<sub>2</sub> complex.

|    |           |           |           |
|----|-----------|-----------|-----------|
| C  | -0.678364 | 0.947185  | 0.757935  |
| C  | -1.715581 | 0.115741  | 1.084509  |
| C  | -2.198258 | -0.451614 | -0.122912 |
| C  | -1.438273 | 0.054125  | -1.142974 |
| N  | -0.519309 | 0.902650  | -0.596796 |
| H  | 0.172905  | 1.410660  | -1.111587 |
| H  | -0.044737 | 1.560446  | 1.374588  |
| H  | -2.087585 | -0.066065 | 2.078440  |
| H  | -3.010137 | -1.150764 | -0.229688 |
| H  | -1.476323 | -0.119982 | -2.204193 |
| Ne | 2.985293  | 0.937664  | -0.005610 |
| Ne | 1.323033  | -2.051695 | 0.082212  |

**Table S8.** Observed transition frequencies of the Pyr-<sup>20</sup>Ne complex (parent species).

| $J'$ | $K_a'$ | $K_c'$ | $F'$ | $J''$ | $K_a''$ | $K_c''$ | $F''$ | Frequency/<br>MHz | Obs.-calc./<br>MHz |
|------|--------|--------|------|-------|---------|---------|-------|-------------------|--------------------|
| 4    | 1      | 4      | 3    | 4     | 0       | 4       | 3     | 2540.051          | 0.033              |
| 4    | 1      | 4      | 5    | 4     | 0       | 4       | 5     | 2540.081          | 0.031              |
| 3    | 1      | 3      | 4    | 3     | 0       | 3       | 4     | 2545.617          | -0.036             |
| 3    | 1      | 3      | 2    | 3     | 0       | 3       | 2     | 2545.617          | 0.035              |
| 3    | 1      | 3      | 3    | 3     | 0       | 3       | 3     | 2545.843          | -0.013             |
| 2    | 1      | 2      | 2    | 2     | 0       | 2       | 1     | 2548.988          | 0.006              |
| 2    | 1      | 2      | 2    | 2     | 0       | 2       | 3     | 2549.433          | 0.005              |
| 2    | 1      | 2      | 1    | 2     | 0       | 2       | 1     | 2549.604          | -0.012             |
| 2    | 1      | 2      | 3    | 2     | 0       | 2       | 3     | 2549.836          | 0.000              |
| 2    | 1      | 2      | 2    | 2     | 0       | 2       | 2     | 2550.238          | 0.007              |
| 2    | 1      | 2      | 3    | 2     | 0       | 2       | 2     | 2550.637          | -0.002             |
| 2    | 1      | 2      | 1    | 2     | 0       | 2       | 2     | 2550.863          | -0.002             |
| 1    | 1      | 1      | 1    | 1     | 0       | 1       | 0     | 2551.797          | -0.002             |
| 1    | 1      | 1      | 2    | 1     | 0       | 1       | 2     | 2552.549          | -0.004             |
| 1    | 1      | 1      | 0    | 1     | 0       | 1       | 1     | 2552.731          | -0.017             |
| 1    | 1      | 1      | 1    | 1     | 0       | 1       | 2     | 2552.928          | 0.006              |
| 1    | 1      | 1      | 2    | 1     | 0       | 1       | 1     | 2553.297          | -0.005             |
| 1    | 1      | 1      | 1    | 1     | 0       | 1       | 1     | 2553.674          | 0.002              |
| 1    | 0      | 1      | 1    | 0     | 0       | 0       | 1     | 4200.316          | 0.005              |
| 1    | 0      | 1      | 2    | 0     | 0       | 0       | 1     | 4201.072          | 0.011              |
| 1    | 0      | 1      | 0    | 0     | 0       | 0       | 1     | 4202.200          | 0.016              |
| 2    | 0      | 2      | 2    | 1     | 1       | 0       | 1     | 5845.136          | 0.007              |
| 2    | 0      | 2      | 2    | 1     | 1       | 0       | 2     | 5845.505          | -0.004             |
| 2    | 0      | 2      | 3    | 1     | 1       | 0       | 2     | 5846.317          | 0.005              |
| 2    | 0      | 2      | 1    | 1     | 1       | 0       | 0     | 5847.319          | -0.009             |
| 1    | 1      | 0      | 0    | 0     | 0       | 0       | 1     | 6755.311          | -0.005             |
| 1    | 1      | 0      | 2    | 0     | 0       | 0       | 1     | 6755.875          | -0.011             |
| 1    | 1      | 0      | 1    | 0     | 0       | 0       | 1     | 6756.250          | -0.016             |
| 4    | 2      | 3      | 3    | 4     | 1       | 3       | 3     | 7644.467          | 0.009              |
| 4    | 2      | 3      | 5    | 4     | 1       | 3       | 5     | 7644.547          | -0.008             |
| 4    | 2      | 3      | 4    | 4     | 1       | 3       | 4     | 7644.893          | -0.039             |
| 3    | 2      | 2      | 3    | 3     | 1       | 2       | 2     | 7652.084          | 0.000              |
| 3    | 2      | 2      | 2    | 3     | 1       | 2       | 2     | 7652.084          | 0.000              |
| 3    | 2      | 2      | 3    | 3     | 1       | 2       | 2     | 7652.084          | 0.000              |
| 3    | 2      | 2      | 2    | 3     | 1       | 2       | 2     | 7652.084          | 0.000              |
| 3    | 2      | 2      | 3    | 3     | 1       | 2       | 4     | 7652.294          | -0.008             |
| 3    | 2      | 2      | 4    | 3     | 1       | 2       | 4     | 7652.294          | -0.008             |
| 3    | 2      | 2      | 2    | 3     | 1       | 2       | 3     | 7652.917          | -0.003             |
| 2    | 2      | 1      | 1    | 2     | 1       | 1       | 1     | 7657.373          | -0.001             |

| $J'$ | $K_a'$ | $K_c'$ | $F'$ | $J''$ | $K_a''$ | $K_c''$ | $F''$ | Frequency/<br>MHz | Obs.-calc./<br>MHz |
|------|--------|--------|------|-------|---------|---------|-------|-------------------|--------------------|
| 2    | 2      | 1      | 3    | 2     | 1       | 1       | 3     | 7658.048          | 0.008              |
| 2    | 2      | 1      | 3    | 2     | 1       | 1       | 2     | 7658.449          | 0.013              |
| 2    | 2      | 1      | 2    | 2     | 1       | 1       | 1     | 7658.623          | -0.001             |
| 2    | 2      | 1      | 2    | 2     | 1       | 1       | 3     | 7658.853          | 0.010              |
| 2    | 2      | 1      | 2    | 2     | 1       | 1       | 2     | 7659.251          | 0.012              |
| 2    | 2      | 0      | 1    | 2     | 1       | 2       | 1     | 7664.168          | -0.023             |
| 2    | 2      | 0      | 1    | 2     | 1       | 2       | 2     | 7664.851          | 0.026              |
| 2    | 2      | 0      | 3    | 2     | 1       | 2       | 2     | 7665.245          | -0.027             |
| 2    | 2      | 0      | 2    | 2     | 1       | 2       | 1     | 7665.430          | -0.011             |
| 3    | 2      | 1      | 2    | 3     | 1       | 3       | 2     | 7665.734          | 0.000              |
| 3    | 2      | 1      | 4    | 3     | 1       | 3       | 4     | 7666.002          | 0.048              |
| 3    | 2      | 1      | 3    | 3     | 1       | 3       | 3     | 7666.588          | 0.003              |

**Table S9.** Observed transition frequencies of the Pyr-<sup>22</sup>Ne isotopologue.

| $J'$ | $K_a'$ | $K_c'$ | $F'$ | $J''$ | $K_a''$ | $K_c''$ | $F''$ | Frequency/<br>MHz | Obs.-calc./<br>MHz |
|------|--------|--------|------|-------|---------|---------|-------|-------------------|--------------------|
| 4    | 1      | 4      | 5    | 4     | 0       | 4       | 5     | 2652.219          | 0.006              |
| 4    | 1      | 4      | 4    | 4     | 0       | 4       | 4     | 2652.319          | -0.021             |
| 4    | 1      | 4      | 5    | 4     | 0       | 4       | 4     | 2653.082          | 0.011              |
| 3    | 1      | 3      | 3    | 3     | 0       | 3       | 4     | 2656.107          | 0.007              |
| 3    | 1      | 3      | 2    | 3     | 0       | 3       | 2     | 2656.660          | 0.001              |
| 3    | 1      | 3      | 4    | 3     | 0       | 3       | 4     | 2656.720          | -0.012             |
| 3    | 1      | 3      | 3    | 3     | 0       | 3       | 3     | 2656.940          | 0.000              |
| 2    | 1      | 2      | 2    | 2     | 0       | 2       | 1     | 2659.246          | 0.003              |
| 2    | 1      | 2      | 2    | 2     | 0       | 2       | 3     | 2659.699          | 0.006              |
| 2    | 1      | 2      | 1    | 2     | 0       | 2       | 1     | 2659.885          | 0.009              |
| 2    | 1      | 2      | 3    | 2     | 0       | 2       | 3     | 2660.109          | 0.009              |
| 2    | 1      | 2      | 2    | 2     | 0       | 2       | 2     | 2660.513          | 0.009              |
| 2    | 1      | 2      | 3    | 2     | 0       | 2       | 2     | 2660.908          | -0.001             |
| 2    | 1      | 2      | 1    | 2     | 0       | 2       | 2     | 2661.137          | 0.001              |
| 1    | 1      | 1      | 1    | 1     | 0       | 1       | 0     | 2661.515          | 0.000              |
| 1    | 1      | 1      | 2    | 1     | 0       | 1       | 2     | 2662.272          | 0.000              |
| 1    | 1      | 1      | 0    | 1     | 0       | 1       | 1     | 2662.459          | -0.005             |
| 1    | 1      | 1      | 1    | 1     | 0       | 1       | 2     | 2662.651          | 0.002              |
| 1    | 1      | 1      | 2    | 1     | 0       | 1       | 1     | 2663.028          | 0.000              |
| 1    | 1      | 1      | 1    | 1     | 0       | 1       | 1     | 2663.400          | -0.004             |
| 1    | 0      | 1      | 1    | 0     | 0       | 0       | 1     | 3977.793          | 0.010              |
| 1    | 0      | 1      | 2    | 0     | 0       | 0       | 1     | 3978.543          | 0.004              |
| 1    | 0      | 1      | 0    | 0     | 0       | 0       | 1     | 3979.678          | 0.005              |
| 2    | 0      | 2      | 2    | 1     | 1       | 0       | 1     | 5290.948          | 0.011              |
| 2    | 0      | 2      | 2    | 1     | 1       | 0       | 2     | 5291.326          | 0.009              |
| 2    | 0      | 2      | 3    | 1     | 1       | 0       | 2     | 5292.135          | 0.009              |
| 2    | 0      | 2      | 1    | 1     | 1       | 0       | 1     | 5292.175          | -0.022             |
| 2    | 0      | 2      | 1    | 1     | 1       | 0       | 0     | 5293.140          | -0.006             |
| 1    | 1      | 0      | 0    | 0     | 0       | 0       | 1     | 6642.013          | -0.004             |
| 1    | 1      | 0      | 2    | 0     | 0       | 0       | 1     | 6642.578          | -0.008             |
| 1    | 1      | 0      | 1    | 0     | 0       | 0       | 1     | 6642.956          | -0.008             |
| 4    | 2      | 3      | 5    | 4     | 1       | 3       | 5     | 7975.884          | -0.040             |
| 4    | 2      | 3      | 4    | 4     | 1       | 3       | 4     | 7976.284          | -0.025             |
| 3    | 2      | 2      | 3    | 3     | 1       | 2       | 2     | 7982.198          | 0.015              |
| 3    | 2      | 2      | 2    | 3     | 1       | 2       | 2     | 7982.198          | 0.015              |
| 3    | 2      | 2      | 3    | 3     | 1       | 2       | 4     | 7982.418          | 0.015              |
| 3    | 2      | 2      | 4    | 3     | 1       | 2       | 4     | 7982.418          | 0.015              |
| 3    | 2      | 2      | 2    | 3     | 1       | 2       | 3     | 7983.051          | 0.020              |
| 3    | 2      | 2      | 3    | 3     | 1       | 2       | 3     | 7983.051          | 0.020              |

| $J'$ | $K_a'$ | $K_c'$ | $F'$ | $J''$ | $K_a''$ | $K_c''$ | $F''$ | Frequency/<br>MHz | Obs.-calc./<br>MHz |
|------|--------|--------|------|-------|---------|---------|-------|-------------------|--------------------|
| 3    | 2      | 2      | 4    | 3     | 1       | 2       | 3     | 7983.051          | 0.020              |
| 2    | 2      | 1      | 1    | 2     | 1       | 1       | 1     | 7986.506          | -0.011             |
| 2    | 2      | 1      | 3    | 2     | 1       | 1       | 3     | 7987.201          | 0.010              |
| 2    | 2      | 1      | 3    | 2     | 1       | 1       | 2     | 7987.591          | -0.003             |
| 2    | 2      | 1      | 2    | 2     | 1       | 1       | 1     | 7987.755          | -0.021             |
| 2    | 2      | 1      | 2    | 2     | 1       | 1       | 3     | 7987.990          | -0.011             |
| 2    | 2      | 1      | 2    | 2     | 1       | 1       | 2     | 7988.403          | 0.000              |
| 2    | 2      | 0      | 1    | 2     | 1       | 2       | 1     | 7991.824          | -0.015             |
| 2    | 2      | 0      | 3    | 2     | 1       | 2       | 3     | 7992.492          | -0.024             |
| 3    | 2      | 1      | 3    | 3     | 1       | 3       | 2     | 7992.834          | -0.001             |
| 3    | 2      | 1      | 4    | 3     | 1       | 3       | 4     | 7993.052          | -0.004             |
| 3    | 2      | 1      | 4    | 3     | 1       | 3       | 3     | 7993.692          | 0.005              |
| 4    | 2      | 2      | 5    | 4     | 1       | 4       | 5     | 7993.692          | 0.007              |
| 3    | 2      | 1      | 3    | 3     | 1       | 3       | 3     | 7993.692          | 0.005              |
| 3    | 2      | 1      | 2    | 3     | 1       | 3       | 3     | 7993.692          | 0.005              |

**Table S10.** Observed transition frequencies of the Pyr-<sup>20</sup>Ne<sup>20</sup>Ne complex (parent species).

| $J'$ | $K_a'$ | $K_c'$ | $F'$ | $J''$ | $K_a''$ | $K_c''$ | $F''$ | Frequency/<br>MHz | Obs.-calc./<br>MHz |
|------|--------|--------|------|-------|---------|---------|-------|-------------------|--------------------|
| 1    | 1      | 0      | 1    | 1     | 0       | 1       | 0     | 3452.806          | 0.004              |
| 1    | 1      | 0      | 2    | 1     | 0       | 1       | 2     | 3453.600          | -0.006             |
| 1    | 1      | 0      | 0    | 1     | 0       | 1       | 1     | 3453.827          | -0.001             |
| 1    | 1      | 0      | 1    | 1     | 0       | 1       | 2     | 3453.980          | -0.006             |
| 1    | 1      | 0      | 2    | 1     | 0       | 1       | 1     | 3454.397          | 0.002              |
| 1    | 1      | 0      | 1    | 1     | 0       | 1       | 1     | 3454.771          | -0.003             |
| 2    | 1      | 1      | 2    | 2     | 0       | 2       | 1     | 3462.982          | -0.007             |
| 2    | 1      | 1      | 2    | 2     | 0       | 2       | 3     | 3463.463          | 0.004              |
| 2    | 1      | 1      | 1    | 2     | 0       | 2       | 1     | 3463.672          | -0.001             |
| 2    | 1      | 1      | 3    | 2     | 0       | 2       | 3     | 3463.895          | -0.003             |
| 2    | 1      | 1      | 2    | 2     | 0       | 2       | 2     | 3464.310          | 0.005              |
| 2    | 1      | 1      | 3    | 2     | 0       | 2       | 2     | 3464.749          | 0.005              |
| 2    | 1      | 1      | 1    | 2     | 0       | 2       | 2     | 3464.990          | 0.002              |
| 3    | 1      | 2      | 4    | 3     | 0       | 3       | 4     | 3479.244          | -0.018             |
| 3    | 1      | 2      | 3    | 3     | 0       | 3       | 3     | 3479.469          | 0.006              |
| 4    | 1      | 3      | 5    | 4     | 0       | 4       | 5     | 3499.802          | 0.009              |
| 4    | 1      | 3      | 3    | 4     | 0       | 4       | 3     | 3499.802          | 0.039              |
| 4    | 1      | 3      | 4    | 4     | 0       | 4       | 4     | 3499.902          | -0.008             |
| 5    | 1      | 4      | 4    | 5     | 0       | 5       | 4     | 3525.550          | -0.007             |
| 5    | 1      | 4      | 6    | 5     | 0       | 5       | 6     | 3525.550          | -0.021             |
| 5    | 1      | 4      | 5    | 5     | 0       | 5       | 5     | 3525.650          | 0.006              |
| 4    | 0      | 4      | 4    | 3     | 1       | 3       | 3     | 4259.920          | 0.003              |
| 4    | 0      | 4      | 3    | 3     | 1       | 3       | 2     | 4260.175          | -0.004             |
| 4    | 0      | 4      | 5    | 3     | 1       | 3       | 4     | 4260.175          | 0.002              |
| 1    | 1      | 1      | 0    | 0     | 0       | 0       | 1     | 5362.696          | 0.005              |
| 1    | 1      | 1      | 2    | 0     | 0       | 0       | 1     | 5363.305          | -0.001             |
| 1    | 1      | 1      | 1    | 0     | 0       | 0       | 1     | 5363.709          | -0.006             |
| 5    | 0      | 5      | 5    | 4     | 1       | 4       | 4     | 6198.934          | -0.008             |
| 5    | 0      | 5      | 4    | 4     | 1       | 4       | 3     | 6199.108          | 0.007              |
| 5    | 0      | 5      | 6    | 4     | 1       | 4       | 5     | 6199.108          | 0.001              |
| 2    | 1      | 2      | 1    | 1     | 0       | 1       | 0     | 7271.760          | 0.001              |
| 2    | 1      | 2      | 2    | 1     | 0       | 1       | 2     | 7272.309          | -0.002             |
| 2    | 1      | 2      | 3    | 1     | 0       | 1       | 2     | 7272.718          | 0.001              |
| 2    | 1      | 2      | 2    | 1     | 0       | 1       | 1     | 7273.100          | 0.001              |
| 2    | 1      | 2      | 1    | 1     | 0       | 1       | 1     | 7273.731          | -0.001             |

**Table 11.** Observed transition frequencies of the Pyr-<sup>20</sup>Ne<sup>22</sup>Ne isotopologue.

| $J'$ | $K_a'$ | $K_c'$ | $F'$ | $J''$ | $K_a''$ | $K_c''$ | $F''$ | Frequency/<br>MHz | Obs.-calc./<br>MHz |
|------|--------|--------|------|-------|---------|---------|-------|-------------------|--------------------|
| 1    | 1      | 0      | 1    | 1     | 0       | 1       | 0     | 3487.167          | 0.000              |
| 1    | 1      | 0      | 2    | 1     | 0       | 1       | 2     | 3487.974          | -0.002             |
| 1    | 1      | 0      | 0    | 1     | 0       | 1       | 1     | 3488.199          | -0.005             |
| 1    | 1      | 0      | 1    | 1     | 0       | 1       | 2     | 3488.352          | 0.002              |
| 1    | 1      | 0      | 2    | 1     | 0       | 1       | 1     | 3488.767          | 0.002              |
| 1    | 1      | 0      | 1    | 1     | 0       | 1       | 1     | 3489.145          | 0.006              |
| 2    | 1      | 1      | 2    | 2     | 0       | 2       | 1     | 3496.749          | 0.007              |
| 2    | 1      | 1      | 2    | 2     | 0       | 2       | 3     | 3497.215          | 0.002              |
| 2    | 1      | 1      | 1    | 2     | 0       | 2       | 1     | 3497.415          | -0.019             |
| 2    | 1      | 1      | 3    | 2     | 0       | 2       | 3     | 3497.657          | 0.000              |
| 2    | 1      | 1      | 2    | 2     | 0       | 2       | 2     | 3498.072          | 0.014              |
| 2    | 1      | 1      | 3    | 2     | 0       | 2       | 2     | 3498.507          | 0.006              |
| 2    | 1      | 1      | 1    | 2     | 0       | 2       | 2     | 3498.737          | -0.012             |
| 3    | 1      | 2      | 3    | 3     | 0       | 3       | 2     | 3511.122          | 0.012              |
| 3    | 1      | 2      | 3    | 3     | 0       | 3       | 4     | 3511.389          | -0.028             |
| 3    | 1      | 2      | 4    | 3     | 0       | 3       | 4     | 3512.092          | -0.005             |
| 3    | 1      | 2      | 3    | 3     | 0       | 3       | 3     | 3512.314          | 0.021              |
| 3    | 1      | 2      | 4    | 3     | 0       | 3       | 3     | 3512.944          | -0.029             |
| 3    | 1      | 2      | 2    | 3     | 0       | 3       | 3     | 3513.231          | 0.020              |
| 5    | 1      | 4      | 5    | 5     | 0       | 5       | 5     | 3555.629          | -0.037             |
| 5    | 1      | 4      | 6    | 5     | 0       | 5       | 6     | 3555.629          | 0.031              |
| 5    | 1      | 4      | 4    | 5     | 0       | 5       | 4     | 3555.629          | 0.044              |
| 6    | 1      | 5      | 6    | 6     | 0       | 6       | 6     | 3584.814          | -0.038             |
| 6    | 1      | 5      | 7    | 6     | 0       | 6       | 7     | 3584.814          | 0.004              |
| 6    | 1      | 5      | 5    | 6     | 0       | 6       | 5     | 3584.814          | 0.011              |
| 4    | 0      | 4      | 4    | 3     | 1       | 3       | 3     | 3908.540          | 0.010              |
| 4    | 0      | 4      | 5    | 3     | 1       | 3       | 4     | 3908.792          | 0.000              |
| 4    | 0      | 4      | 3    | 3     | 1       | 3       | 2     | 3908.792          | -0.008             |
| 1    | 1      | 1      | 0    | 0     | 0       | 0       | 1     | 5318.925          | 0.004              |
| 1    | 1      | 1      | 2    | 0     | 0       | 0       | 1     | 5319.542          | -0.001             |
| 1    | 1      | 1      | 1    | 0     | 0       | 0       | 1     | 5319.946          | -0.011             |
| 5    | 0      | 5      | 5    | 4     | 1       | 4       | 4     | 5767.693          | -0.007             |
| 5    | 0      | 5      | 6    | 4     | 1       | 4       | 5     | 5767.871          | 0.001              |
| 5    | 0      | 5      | 4    | 4     | 1       | 4       | 3     | 5767.871          | 0.005              |
| 2    | 1      | 2      | 1    | 1     | 0       | 1       | 0     | 7149.884          | 0.011              |
| 2    | 1      | 2      | 2    | 1     | 0       | 1       | 2     | 7150.417          | -0.015             |
| 2    | 1      | 2      | 2    | 1     | 0       | 1       | 1     | 7151.221          | 0.000              |
| 2    | 1      | 2      | 1    | 1     | 0       | 1       | 1     | 7151.851          | 0.007              |

**Table S12.** Observed transition frequencies of the Pyr-<sup>22</sup>Ne<sup>22</sup>Ne isotopologue.

| $J'$ | $K_a'$ | $K_c'$ | $F'$ | $J''$ | $K_a''$ | $K_c''$ | $F''$ | Frequency/<br>MHz | Obs.-calc./<br>MHz |
|------|--------|--------|------|-------|---------|---------|-------|-------------------|--------------------|
| 1    | 1      | 0      | 1    | 1     | 0       | 1       | 0     | 3519.542          | -0.005             |
| 1    | 1      | 0      | 2    | 1     | 0       | 1       | 2     | 3520.397          | 0.028              |
| 2    | 1      | 1      | 2    | 2     | 0       | 2       | 1     | 3528.444          | 0.007              |
| 2    | 1      | 1      | 2    | 2     | 0       | 2       | 3     | 3528.890          | -0.028             |
| 2    | 1      | 1      | 1    | 2     | 0       | 2       | 1     | 3529.128          | -0.010             |
| 2    | 1      | 1      | 3    | 2     | 0       | 2       | 3     | 3529.356          | -0.011             |
| 2    | 1      | 1      | 2    | 2     | 0       | 2       | 2     | 3529.771          | -0.009             |
| 2    | 1      | 1      | 3    | 2     | 0       | 2       | 2     | 3530.219          | -0.011             |
| 2    | 1      | 1      | 1    | 2     | 0       | 2       | 2     | 3530.491          | 0.011              |
| 3    | 1      | 2      | 2    | 3     | 0       | 3       | 2     | 3542.707          | 0.003              |
| 3    | 1      | 2      | 3    | 3     | 0       | 3       | 3     | 3542.997          | 0.017              |
| 1    | 1      | 1      | 0    | 0     | 0       | 0       | 1     | 5276.642          | 0.015              |
| 1    | 1      | 1      | 2    | 0     | 0       | 0       | 1     | 5277.259          | 0.002              |
| 1    | 1      | 1      | 1    | 0     | 0       | 0       | 1     | 5277.676          | -0.001             |
| 2    | 1      | 2      | 1    | 1     | 0       | 1       | 0     | 7033.057          | -0.008             |
| 2    | 1      | 2      | 3    | 1     | 0       | 1       | 2     | 7034.055          | 0.013              |
| 2    | 1      | 2      | 2    | 1     | 0       | 1       | 1     | 7034.432          | -0.003             |
| 2    | 1      | 2      | 1    | 1     | 0       | 1       | 1     | 7035.068          | -0.010             |
